# Supplementary material
Source: PubMed Central journal article supplement (PMC1988954)
Supplement: blood_blood-2007-04-084921_2.pdf [file blood_blood-2007-04-084921_2.pdf]

| Laboratory variable | Non sickle Population<br>Normal range | Sickle Population<br>Categories | Percentiles             |                                          |
|---------------------|---------------------------------------|---------------------------------|-------------------------|------------------------------------------|
| AST(SGOT)           | male                                  | 5--40                           | 1 less than 40          | 50% of SCA popu<br><br>2% population     |
|                     | females                               | 5--33                           | 2 between 40<br>and 100 |                                          |
|                     |                                       |                                 | 3 above 100             |                                          |
| ALT(SGPT)           | male                                  | 7--46                           | 1 less than 36          |                                          |
|                     | females                               | 4--35                           | 2 36--100               |                                          |
|                     |                                       |                                 | 3 above 100             |                                          |
| BUN2crea            |                                       | 10--20                          | -1 below 10             | 25% of sca populatio<br>about 50%<br>25% |
|                     |                                       |                                 | 0 10--20                |                                          |
|                     |                                       |                                 | 1 above 20              |                                          |
| Bilirubin           |                                       | 0-1.3                           | 1 below 1.3             | 25%<br>50%<br>25%                        |
|                     |                                       |                                 | 2 1.3-3.4               |                                          |
|                     |                                       |                                 | 3 >3.4                  |                                          |
| HBG                 | infant                                | 14-20                           | -1 below 8              | about 25%<br>about 50%                   |
|                     | ad-fem                                | 12-16                           | 0 8--12                 |                                          |
|                     | ad-male                               | 14-18                           | 1 above 12              |                                          |
| LDH                 |                                       | 300-600                         | -1 below 300            | 25%<br>about 55%<br>about 20%            |
|                     |                                       |                                 | 0 300-600               |                                          |
|                     |                                       |                                 | 1 >600                  |                                          |
| WBC                 |                                       | 3.8-10.8                        | 0 <10.8                 | about 50%<br>about 75%                   |
|                     |                                       |                                 | 1 10.8-13.5             |                                          |
|                     |                                       |                                 | 2 >13.5                 |                                          |
| Plates              |                                       | 130-400                         | 0 <400                  | about 50%<br>about 75%                   |
|                     |                                       |                                 | 1 400-490               |                                          |
|                     |                                       |                                 | 2 >490                  |                                          |
| MCV                 |                                       | 80-100                          | -1 <80                  | about 25%<br>about 65%<br>about 10%      |
|                     |                                       |                                 | 0 80-98                 |                                          |
|                     |                                       |                                 | 1 >98                   |                                          |
| Retic               |                                       |                                 | -1 <4.8                 | 25%<br>50%<br>25%                        |
|                     |                                       |                                 | 0 4.8-13                |                                          |
|                     |                                       |                                 | 1 >13                   |                                          |
| HBF.P               |                                       |                                 | -1 <2                   | 25%<br>50%<br>25%                        |
|                     |                                       |                                 | 0 2-9                   |                                          |
|                     |                                       |                                 | 1 >9                    |                                          |
| Sys.BP              |                                       |                                 | -1 < 80                 | age<br>≤ 18                              |
|                     |                                       |                                 | 0 80-120                |                                          |
|                     |                                       |                                 | 1 120-140               |                                          |
|                     |                                       |                                 | 2 > 140                 |                                          |
|                     |                                       |                                 | -1 < 80                 | >18                                      |
|                     |                                       |                                 | 0 80-140                |                                          |
|                     |                                       | 1 140-160                       |                         |                                          |
|                     |                                       | 2 > 160                         |                         |                                          |
