# Supplementary material
Source: PubMed Central journal article supplement (PMC1988954)
Supplement: blood_blood-2007-04-084921_3.pdf [file blood_blood-2007-04-084921_3.pdf]

| Variable          | Log(Bayes Factor) | Log(Bayes Factor) average | Effect (OR)                  | Effect (OR)              | Referent group |
|-------------------|-------------------|---------------------------|------------------------------|--------------------------|----------------|
| ACS               | 85.76             | 84.79                     | 1.18 (1.14;1.24)             |                          | no ACS         |
| Age               | 110.43            | 84.79                     | 2.67 (2.44;2.91) [18-40]     | 7.61 (5.11;1.34) [>40]   | 2--18 years    |
| Bilirubin         | 345.09            | 295.56                    | 1.43 (1.28;1.60) [1.3-3.4]   | 1.59 (1.02;2.49) [>3.4]  | normal         |
| Blood Transfusion | 47.00             | 39.61                     | 2.01 (1.78;2.27)             |                          | no chronic BT  |
| LDH               | 196.90            | 157.39                    | 0.85 (0.76;0.94) [<300]      | 1.1 (0.99;1.24) [>600]   | normal         |
| MCV               | 561.19            | 474.22                    | 0.54 (0.49;0.60) [<80]       | 1.98 (1.71; 2.29) [>98]  | normal         |
| Pain              | 245.70            | 205.31                    | 1.61 (1.45;1.77)             |                          | no pain        |
| Priapism          | 42.07             | 38.67                     | 1.35 (1.09;1.67)             |                          | no priapism    |
| Reticulocytes     | 324.12            | 276.23                    | 0.5 (0.44;0.55) [<4.8]       | 1.51 (1.39;1.65) [>13]   | normal         |
| Sepsis            | 447.15            | 367.48                    | 67.19(57.66;78.29)           |                          | no sepsis      |
| Sex               | 2302.11           | 1957.89                   | 1.16 (1.08;1.25)             |                          | females        |
| Stroke            | 129.49            | 111.53                    | 3.81 (3.20;4.54)             |                          | no stroke      |
| Sys BP            | 88.49             | 79.95                     | 2.84 (1.67;4.82) [low]       | 3.41 (2.71;4.27) [high]  | normal         |
| WBC               | 5.01              | 3.40                      | 1.37 (1.24;1.51) [10.8-13.5] | 1.92 (1.44;2.55) [>13.5] | normal         |
