# Supplementary material
Source: PubMed Central journal article supplement (PMC1988954)
Supplement: blood_blood-2007-04-084921_4.pdf [file blood_blood-2007-04-084921_4.pdf]

| Covariate Name                 | Covariate Levels | Parameter estimate | OR   | 95% CI OR       | p-value OR | Type III p-value |
|--------------------------------|------------------|--------------------|------|-----------------|------------|------------------|
| <i>Reticulocyte</i>            | -1               | -0.56              | 0.57 | (0.324, 1.012)  | 0.0548     | 0.0106           |
|                                | 0                | -0.61              | 0.54 | (0.361, 0.818)  | 0.0034     |                  |
|                                | 1                | .                  | .    | .               | .          |                  |
| <i>Age category</i>            | 1                | -3.37              | 0.03 | (0.019, 0.063)  | <0.0001    | <0.0001          |
|                                | 2                | -1.19              | 0.30 | (0.184, 0.502)  | <0.0001    |                  |
|                                | 3                | .                  | .    | .               | .          |                  |
| <i>AST</i>                     | 1                | -0.94              | 0.39 | (0.134, 1.129)  | 0.0825     | 0.0020           |
|                                | 2                | -0.27              | 0.77 | (0.267, 2.194)  | 0.6196     |                  |
|                                | 3                | .                  | .    | .               | .          |                  |
| <i>pain</i>                    | 0                | 0.90               | 2.46 | (1.463, 4.140)  | 0.0007     | 0.0007           |
|                                | 1                | .                  | .    | .               | .          |                  |
| <i>sepsis</i>                  | 0                | -4.69              | 0.01 | (0.006, 0.014)  | <0.0001    | <0.0001          |
|                                | 1                | .                  | .    | .               | .          |                  |
| <i>stroke</i>                  | 0                | -1.01              | 0.36 | (0.206, 0.642)  | 0.0005     | 0.0005           |
|                                | 1                | .                  | .    | .               | .          |                  |
|                                | 2                | .                  | .    | .               | .          |                  |
| <i>Systolic Blood Pressure</i> | -1               | 1.70               | 5.49 | (0.335, 90.190) | 0.2328     | <0.0001          |
|                                | 0                | -1.48              | 0.23 | (0.024, 2.192)  | 0.2005     |                  |
|                                | 1                | 0.41               | 1.50 | (0.142, 15.936) | 0.7345     |                  |
|                                | 2                | .                  | .    | .               | .          |                  |
